# Supplementary material
Source: PubMed Central journal article supplement (PMC2443405)
Supplement: NIHMS55600-supplement-supplement_1.pdf [file NIHMS55600-supplement-supplement_1.pdf]

## Supplemental Figure

(A) qPCR dilution profiles for ACE insertion, ACE deletion, and GSTM1 reactions using genomic DNA from a participant containing all three alleles. (B) Normalized qPCR dilution profiles. Values represent the average of duplicate measurements and error bars represent the standard error of the mean.

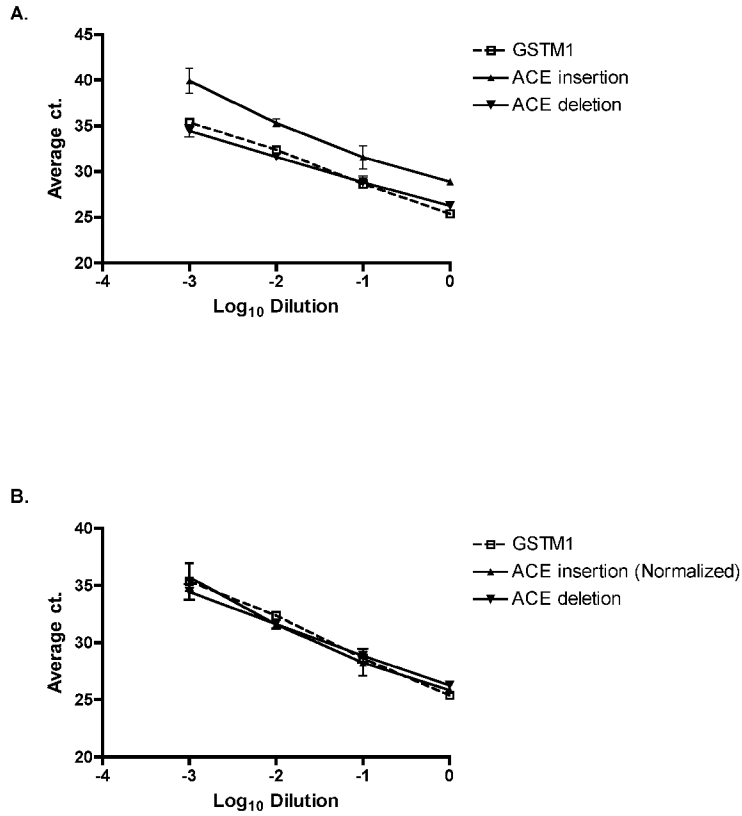

**Supplemental Table: Primer and Probe Sequences, from Lo et al. [4]**

| <b>Primer</b> | <b>Sequence</b>                                             |
|---------------|-------------------------------------------------------------|
| GST-194F      | 5' -GGA GAA GAT TCG TGT GGA CA-3'                           |
| GST-273R2     | 5' -CTG GAT TGT AGC AGA TCA TAC-3'                          |
| ACE-1721F     | 5' -GCT GGG ATT ACA GGC GTG ATA-3'                          |
| ACE-1428F     | 5' -CCA TTT CTC TAG ACC TGC TGC C-3'                        |
| ACE-1826R     | 5' -GCC CTT AGC TCA CCT CTG CTT-3'                          |
| <b>Probe</b>  | <b>Sequence</b>                                             |
| GST-215T      | 5' FAM-TTT GGA GAA CCA GAC CAT GGA CAA C-TAMRA3'            |
| ACE-1745T     | 5' FAM-TCA CTT TTA TGT GGT TTC GCC AAT TTT ATT CCA-TAMARA3' |
